# Supplementary material for: AFM evaluation of a humanized recombinant antibody affecting C. auris cell wall and stability
Source: Royal Society of Chemistry journal article supplement (doi:10.1039/d2ra07217c), 2023-01-01

## Supplementary information

**Figure S1. *C. auris* growth after treatments.** *C. auris* cells were treated with the humanized mAb H5K1, with sub-MIC concentrations of the antifungal drugs fluconazole, caspofungin, amphotericin B, and with their combinations with H5K1. Their growth was monitored after 24 and 48 hours by measuring the absorbance at 405 nm following EUCAST guidelines. Despite the different levels of damage, all the concentrations used in this study allowed *C. auris* to grow, hence are suitable for the AFM analyses.

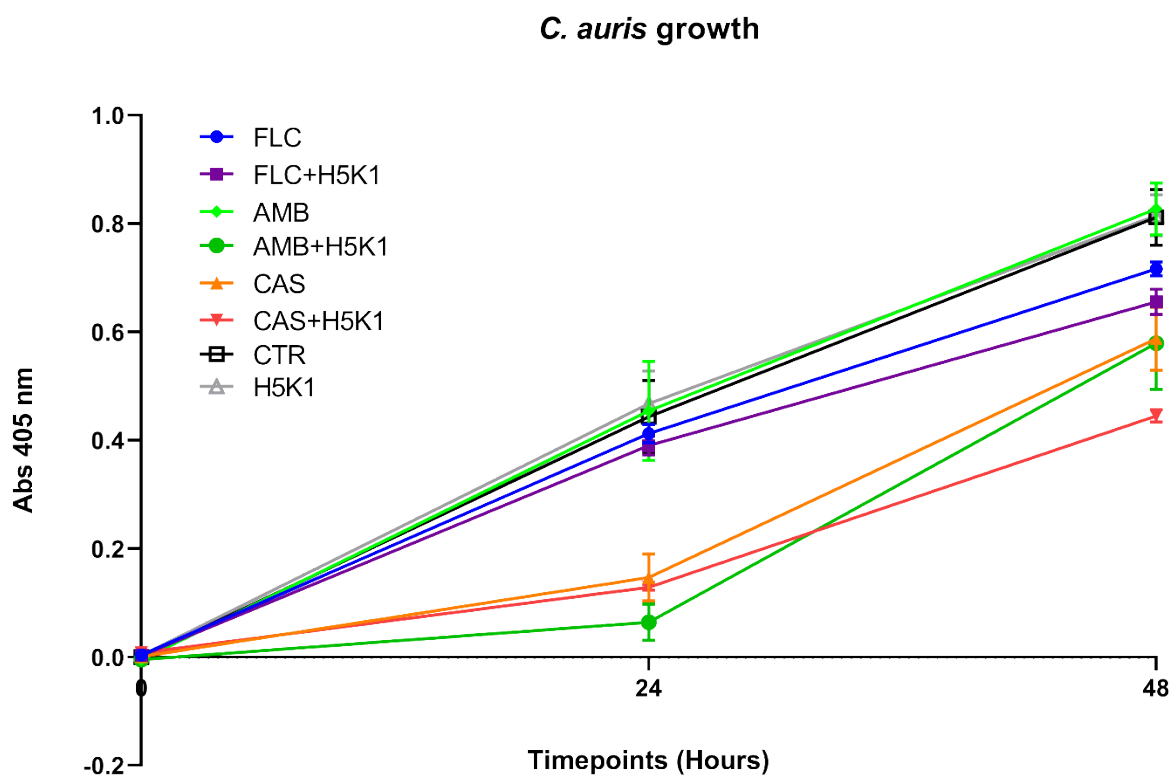

Supplement: d2ra07217c1.pdf [file d2ra07217c1.pdf]
